# Supplementary material for: Identifying critical state of complex diseases by single-sample Kullback–Leibler divergence
Source: BMC Genomics. 2020 Jan 28;21:87. doi: 10.1186/s12864-020-6490-7 (PMC6988219; doi:10.1186/s12864-020-6490-7)
Supplement: Supplementary file 2 — Additional file 2. The signaling genes of LUSC, LUAD, STAD, THCA and COAD. [file 12864_2020_6490_MOESM2_ESM.xlsx]

## Sheet: name
				The signaling genes of LUSC, LUAD, STAD, THCA and COAD

## Sheet: LUSC
ANLN	13
ARHGAP11A	13
ASF1B	13
ASPM	13
ATAD2	13
AURKA	13
AURKB	13
BIRC5	13
BRIP1	13
BUB1	13
BUB1B	13
C15orf41	13
C16orf59	13
C17orf53	13
C1orf135	13
C21orf45	13
C9orf100	13
C9orf140	13
CAPNS2	13
CBLC	13
CCNA2	13
CCNB1	13
CCNB2	13
CCNF	13
CCT3	13
CCT6A	13
CDC20	13
CDC25C	13
CDC45	13
CDC6	13
CDCA5	13
CDCA8	13
CDK1	13
CDT1	13
CENPA	13
CENPF	13
CENPH	13
CENPI	13
CENPL	13
CHAF1B	13
CKAP2L	13
CKS1B	13
CLCN2	13
CNFN	13
CSE1L	13
CSTF2	13
CTSL2	13
CYP26A1	13
DDX39	13
DEPDC1	13
DEPDC1B	13
DKC1	13
DNAJC9	13
DSCC1	13
E2F8	13
ECT2	13
EFNA3	13
EME1	13
EPR1	13
EPT1	13
ERCC6L	13
ESCO2	13
ESPL1	13
ESRP1	13
ETV4	13
EXO1	13
F12	13
FAM131C	13
FAM72D	13
FAM83B	13
FAM83H	13
FEN1	13
FKBP4	13
FOXM1	13
GCLC	13
GINS1	13
GINS3	13
GINS4	13
GJB2	13
GMPS	13
GPR87	13
GRHL3	13
GTSE1	13
H2AFZ	13
HEATR2	13
HELLS	13
HIST1H2AG	13
HIST1H3H	13
HJURP	13
HMGA1	13
HMGA2	13
HN1L	13
HSPD1	13
IGF2BP3	13
IQGAP3	13
ITPKA	13
KIAA1524	13
KIF11	13
KIF14	13
KIF18B	13
KIF23	13
KIF2C	13
KIF4A	13
KIFC1	13
KLC3	13
KPNA2	13
KREMEN2	13
MAD2L1	13
MCM2	13
MCM4	13
MCM6	13
MCM8	13
MELK	13
MEX3A	13
MKI67	13
MMP11	13
MND1	13
MSH6	13
MYBL2	13
NCAPD2	13
NCAPG	13
NCAPH	13
NEIL3	13
NEK2	13
NFKBIL2	13
NKPD1	13
NOL11	13
NUF2	13
NUP155	13
NUSAP1	13
OIP5	13
ORC1L	13
ORC6L	13
PAK1	13
PIAS3	13
PITX1	13
PKMYT1	13
PLK1	13
PLK4	13
POLQ	13
PPAT	13
PRAME	13
PRC1	13
PTDSS1	13
PTPRM	13
RACGAP1	13
RAD51	13
RAD54B	13
RAD54L	13
RANBP1	13
RCC1	13
RCC2	13
RECQL4	13
RFWD3	13
RNASEH2A	13
SGOL1	13
SKA1	13
SKA3	13
SLC2A1	13
SMARCB1	13
SPC24	13
SPC25	13
SRD5A1	13
SUV39H1	13
TBRG4	13
TH1L	13
TIMELESS	13
TK1	13
TMEM132A	13
TOP2A	13
TPX2	13
TRAP1	13
TRIP13	13
TROAP	13
TTK	13
TUBG1	13
UBE2C	13
UBE2S	13
UHRF1	13
WDHD1	13
WDR62	13
XRCC2	13
ZMYND19	13
ZNF542	13
ZWINT	13
ABCA12	12
ACTL6A	12
ALDOA	12
ALG3	12
ALS2CR4	12
ARTN	12
ATAD5	12
AURKAPS1	12
B4GALNT4	12
BLM	12
BRCA1	12
BRI3BP	12
C12orf11	12
C15orf42	12
C16orf75	12
C19orf48	12
C1orf106	12
C1orf112	12
C20orf20	12
CARD14	12
CASC5	12
CASP10	12
CCDC138	12
CCNE1	12
CCT4	12
CCT7	12
CD151	12
CDC25A	12
CDCA2	12
CDCA3	12
CDCA4	12
CDK4	12
CENPE	12
CENPN	12
CENPO	12
CEP55	12
CHEK1	12
CHEK2	12
CHRNA5	12
CHRNB4	12
COIL	12
COPS6	12
CRKL	12
CSNK2A1	12
CST1	12

## Sheet: LUAD
HRG	59
PDX1	59
TLX1	59
PYCR1	54
NPSR1	53
EFNA3	52
B3GNT3	50
ETV4	50
PITX2	50
CBLC	49
MDK	49
PPAT	49
TOP2A	49
HOXC13	48
ONECUT1	48
SRPK1	48
BRDT	47
GPT2	47
PAX7	47
XDH	47
EPHA10	46
FGF19	46
NUF2	46
STX1A	46
CDCA8	45
EIF2AK1	45
HIST1H3J	45
LGR4	45
RASAL1	45
TERT	45
ASPM	44
AURKA	44
CDC20	44
CRABP2	44
CTHRC1	44
DLL3	44
EFNA4	44
GNGT1	44
KIF14	44
PAICS	44
ADM2	43
ARHGEF16	43
C2orf29	43
CENPF	43
COL10A1	43
CYP24A1	43
DEPDC1B	43
DLGAP5	43
ERCC6L	43
GABRA3	43
GINS1	43
GJB2	43
KDELR3	43
PLK1	43
PPP1R14B	43
RAD54L	43
SPDEF	43
ABCA12	42
CDC6	42
CNTNAP4	42
EPCAM	42
EXO1	42
FUT9	42
KCNQ2	42
KIF2C	42
MYH6	42
SPAG4	42
TRPM8	42
XRCC2	42
ARSH	41
CDC25C	41
ERO1L	41
FGF11	41
GALNT7	41
ITPKA	41
KIF4A	41
MTNR1A	41
NR2E1	41
OR4C6	41
RUSC1	41
SFXN1	41
STIL	41
SYT7	41
TIMELESS	41
TPX2	41
TTK	41
UGT1A9	41
BUB1B	40
CALCB	40
GCNT3	40
GFPT1	40
GREM1	40
KRT16	40
MMP11	40
PVRL4	40
RGS17	40
SLCO1B3	40
T	40
TROAP	40
TTR	40
WDHD1	40
AHSG	39
ALDH18A1	39
ANLN	39
AURKB	39
BUB1	39
CCNB1	39
DLX2	39
DNAH14	39
EFNA2	39
EZH2	39
GCGR	39
KIF15	39
KIF20A	39
MELK	39
PARP1	39
PIWIL1	39
SLC25A10	39
TDRKH	39
TFR2	39
UBE2T	39
ZIC2	39
ADAM8	38
AGMAT	38
C10orf90	38
C21orf45	38
CEP55	38
EGLN3	38
EN2	38
FBXO32	38
FGF5	38
FOXD3	38
GINS2	38
HJURP	38
HTR3A	38
KNTC1	38
NEK2	38
PAFAH1B3	38
PDIA4	38
PRAME	38
ABCC3	37
BRIP1	37
C4orf6	37
CCNB2	37
CGA	37
COL11A1	37
EMX1	37
FUT2	37
IARS2	37
KDELR2	37
MCM2	37
MIOX	37
MYBL2	37
NCAPH	37
ORC6L	37
RRM2	37
SRD5A1	37
SULT4A1	37
TFF1	37
UBE2C	37
BIRC5	36
EPHA8	36
FADS6	36
GDNF	36
IQGAP3	36
KIF11	36
KRT3	36
MCM10	36
MCM4	36
NONO	36
PAH	36
POU3F2	36
POU4F1	36
S100A7	36
SALL1	36
SPAG5	36
TEX15	36
ASNS	35
CCNA2	35
CDC45	35
CENPA	35
CGB5	35
DNA2	35
FGB	35
FLAD1	35
HIST1H2AJ	35
HMMR	35
IL1F7	35
MARCKSL1	35
MNX1	35
NDC80	35
NT5E	35
PLOD2	35
POLE2	35
SGOL1	35
SLC7A10	35
SPC25	35
ST14	35
STK39	35
STRA6	35
TESC	35
TLX2	35
ZWINT	35
CCNF	34
CDX2	34
CENPE	34
CRHR1	34
FANCI	34
FUT3	34
GALNT14	34
GBX2	34
HIST1H2AM	34
HIST1H3C	34
KIF26B	34
KLK6	34
MCM6	34
PKP3	34
POLQ	34
PTGES	34
RAB3B	34
RAC3	34
RAMP1	34
SLC2A1	34
TNFSF11	34
UNC5CL	34
C15orf42	33
C16orf75	33
CENPI	33
EME1	33
EPN3	33
ESPL1	33
FUT8	33
GAPDH	33
HOXA11	33
KCNN4	33
KCNV1	33
KIF18B	33
KIF23	33
MAD2L1	33
MKI67	33
NFKBIL2	33
NMU	33
OR2B6	33
PRC1	33
PROC	33
QPRT	33
SRPK3	33
TFAP2B	33

## Sheet: STAD
COL10A1	19
SLC39A10	19
BGN	18
CLDN1	18
COL1A1	18
CTHRC1	18
ESM1	18
GLT25D1	18
KAL1	18
MAP4K4	18
MMP11	18
SALL4	18
SOX4	18
WDR43	18
ADAMTS18	17
ADAMTS2	17
AGRN	17
ATAD2	17
CENPO	17
COL11A1	17
COL3A1	17
DENR	17
FAM91A1	17
FOXS1	17
HECW2	17
HOXC8	17
JAG2	17
KIAA1199	17
LRP8	17
MSR1	17
MTBP	17
PGM2L1	17
TCOF1	17
THBS2	17
WNT2	17
ABCE1	16
ATP11A	16
CAD	16
CCT6A	16
CILP2	16
CST1	16
DKC1	16
ENC1	16
FAP	16
FLJ41200	16
GABRD	16
GTPBP4	16
HSP90AB1	16
IER5L	16
INHBA	16
MAPK15	16
MFI2	16
MMP14	16
MTHFD1L	16
NAA15	16
OLFML2B	16
OLR1	16
OSMR	16
OXTR	16
PMEPA1	16
PPAT	16
PSMD11	16
RCC2	16
RNFT2	16
STRA6	16
SUV39H2	16
VCAN	16
VMA21	16
XRN2	16
ZNF469	16
ZSWIM4	16
ADAM17	15
ADAMTS12	15
ADAMTS14	15
ATP13A3	15
C15orf42	15
C1QTNF6	15
CBX2	15
CDH11	15
CDH24	15
CDH3	15
CHST1	15
CSE1L	15
DDX10	15
DDX18	15
DPY19L1	15
E2F3	15
EPHB4	15
F2R	15
FAM122B	15
FNDC1	15
GPATCH4	15
HEATR1	15
HMGA2	15
HS2ST1	15
KIF14	15
KIF23	15
MASTL	15
MDFI	15
MEX3A	15
MIR1304	15
MTDH	15
MXRA5	15
MYO1B	15
NOTCH3	15
P4HA3	15
PLEKHG1	15
PLXNA1	15
POLR1B	15
PRR7	15
PUS7	15
RASAL2	15
RBM28	15
SMC4	15
SPP1	15
SULF1	15
TEAD4	15
TOP2A	15
TREM2	15
ZNF146	15
ACAN	14
AJUBA	14
ATP2C1	14
ATP6V1C1	14
BMS1	14
C10orf2	14
CASP2	14
CBX3	14
CD276	14
CENPF	14
CLSPN	14
COL1A2	14
COL5A2	14
COL7A1	14
COMP	14
DCLK3	14
DDX21	14
DESI2	14
DHX33	14
DHX34	14
DIEXF	14
DSCC1	14
FAM105B	14
GAD1	14
GMPS	14
GPATCH2	14
HAUS6	14
HSP90AA1	14
HSPD1	14
HSPH1	14
IGF2BP3	14
IGFL2	14
KCNJ14	14
KIF18B	14
LOC100287314	14
LOC541471	14
LOX	14
LRFN4	14
LYAR	14
LZTS1	14
MATN3	14
MEX3D	14
NAA25	14
NFE2L3	14
NUDCD1	14
PAFAH1B2	14
PLEKHG4	14
PODNL1	14
PODXL	14
PRC1	14
PRPF40A	14
PRRC2C	14
RIPK2	14
RNF168	14
RRP12	14
SEPT11	14
SERBP1	14
SERINC5	14
STIL	14
SYNCRIP	14
TARBP1	14
TGIF1	14
TUBB	14
WDHD1	14
WDR62	14
XPO5	14
XRCC2	14
XXYLT1	14
YTHDF1	14
YWHAG	14
ZNF121	14
ADCY3	13
ANLN	13
ATG7	13
BAAT	13
BMP1	13
C14orf105	13
CPNE1	13
CPXM1	13
CSPP1	13
DHX37	13
DNMT1	13
DRD1	13
ECT2	13
FAM40B	13
FANCI	13
FIGNL1	13
FOXC1	13
GNL3L	13
HAUS2	13
HN1L	13
IL1RAP	13
ITPRIPL2	13
KIAA1751	13
KIF26B	13
KNTC1	13
LMNB2	13
LSG1	13
MFAP2	13
MFI2-AS1	13
MIR3606	13
MMS22L	13
MORC4	13
NCBP2	13
NCL	13
NOM1	13
NONO	13
NOP2	13
NOS3	13
NPRL3	13
PABPC1L	13
PAICS	13
PDCD11	13
PHF14	13
PIGW	13
PLAU	13
POLH	13
PRKDC	13
PRKX	13
PUS1	13
RAE1	13
RCN1	13
RECQL4	13
RFWD3	13
RFX8	13
RTKN2	13
S100A3	13
SERPINH1	13
SLC25A32	13
SPARC	13
SRPX2	13
SULF2	13
TAS2R5	13
TEX10	13
TIMP1	13
TPX2	13
TTI1	13
UHRF1	13
ULBP1	13
URB2	13
USP31	13
UTP20	13
ZBTB33	13
ZNF281	13
ZNF562	13
ZNF761	13

## Sheet: THCA
CTSB	44
CLU	43
GAPDH	43
NPC2	43
ADAM6	42
APLP2	42
GSS	42
IGF2BP2	42
TG	42
TPO	42
ACTB	41
ACTG1	41
ADD3	41
CD74	41
CTGF	41
DUSP1	41
EGR1	41
ELFN1	41
FCGBP	41
FOS	41
FOSB	41
GABRD	41
GNAS	41
GPX3	41
JAG2	41
JUN	41
METTL4	41
PTP4A3	41
SPATS2	41
UBTD1	41
ATP1A1	40
B2M	40
CALR	40
CD24	40
CYBRD1	40
CYR61	40
GABRB2	40
MANEAL	40
MAPK13	40
SERINC2	40
SRCIN1	40
TNFRSF11B	40
ZFP36L2	40
BBC3	39
CD63	39
EEF1A1	39
EFEMP1	39
HLA-A	39
HLA-B	39
HSP90B1	39
HSPA5	39
IGFBP5	39
ITPR1	39
LAD1	39
LOC96610	39
RPS4X	39
SEMA3F	39
SPARC	39
SPINT1	39
TPT1	39
VIM	39
CC2D1A	38
DYSF	38
GLUL	38
IER2	38
METTL7B	38
PAX8	38
PDE9A	38
PHLDA3	38
SLC26A7	38
TIMP3	38
ZFP36	38
AIF1L	37
AK1	37
ATP6AP1	37
BMP8A	37
C4A	37
CAMK2N2	37
CITED1	37
DCN	37
EEF2	37
ESM1	37
FHL1	37
FTH1	37
FTL	37
HP1BP3	37
IYD	37
KLF6	37
KRT8	37
LAYN	37
LOC286002	37
LOC400794	37
LRIG1	37
MCFD2	37
NEAT1	37
NINJ1	37
NR4A1	37
PAPSS2	37
PDIA3	37
PPP1R15B	37
RPL3	37
SAPS3	37
SDC2	37
ST3GAL5	37
TFF3	37
TYRO3	37
AP1S1	36
APLN	36
ATP2C2	36
BTG2	36
C6orf138	36
CRABP1	36
CTSA	36
FAM84A	36
HCN4	36
HLA-C	36
MAGT1	36
MATN2	36
NTRK2	36
PLXND1	36
PRAF2	36
PRPS1	36
SFRS1	36
SLC26A4	36
SMARCD3	36
SORBS2	36
THRSP	36
ABCC6P2	35
AHNAK	35
APP	35
BAX	35
C16orf89	35
CANX	35
CTSD	35
DACH2	35
DIO2	35
EGR2	35
EPS8	35
ETV4	35
FMOD	35
HLA-DRA	35
JUNB	35
KIAA2013	35
KLHDC8A	35
KRT7	35
LRP4	35
NPAS1	35
NPDC1	35
PKM2	35
PLA2R1	35
PVRL4	35
RAD23B	35
RHBDD2	35
SCARA3	35
SORD	35
SYNE1	35
TMEM215	35
TNFRSF10C	35
ZFPM2	35
ABCC6	34
ANXA1	34
ASAH1	34
BMP1	34
C16orf52	34
C9orf167	34
COG5	34
DDX17	34
DIO1	34
FHOD1	34
FOLH1	34
FXYD3	34
GOLT1A	34
GRHL3	34
GSN	34
KLF9	34
MAT2A	34
MCL1	34
MMP11	34
MT1G	34
MTCH1	34
MTHFD1L	34
MXRA8	34
NOLC1	34
PAFAH1B3	34
PGCP	34
PPIB	34
PSD3	34
RHOC	34
RTKN	34
RYR2	34
SAT1	34
SNX25	34
ST14	34
TAPT1	34
TAX1BP3	34
TBC1D4	34
TMEM8A	34
TNS1	34
XIST	34
YARS	34
ZNF560	34
AGRN	33
C14orf45	33
CBX2	33
CCDC85A	33
CCND1	33
CD44	33
CITED2	33
CPNE2	33
DPP6	33
ETV5	33
FAM116B	33
FDFT1	33
GJA4	33
GLT1D1	33
GNB2L1	33
GRM4	33
HSPA1A	33
HSPA8	33
IGFBP2	33
IGFBP4	33
INSR	33
ITPR3	33
MMS19	33
OXCT1	33
PDK4	33
PKP4	33
PLA2G12B	33
PLD3	33
RRBP1	33
S100A6	33
SCPEP1	33
SELENBP1	33
SGK3	33
SLIT1	33
SRP68	33
TCEAL2	33
TFCP2L1	33
TMSL3	33
UBC	33
UBE2QL1	33
UCHL5	33
ULBP2	33
USP54	33
ZCCHC16	33

## Sheet: COAD
ACTB	25
ADAM6	25
CALM2	25
CD46	25
EEF1A1	25
EIF3E	25
HLA-C	25
HSP90AA1	25
HSPA8	25
IGF2	25
LDHA	25
RPL8	25
RPL9	25
RPS3A	25
RPS6	25
TMSL3	25
TPT1	25
TRAM1	25
YWHAZ	25
ACTG1	24
AGR2	24
ALDOA	24
B2M	24
BTF3	24
CANX	24
CD164	24
CD24	24
CEACAM5	24
CEACAM6	24
EEF1A1P9	24
EEF2	24
EIF4A2	24
EIF4G2	24
EPCAM	24
FTH1	24
FTL	24
H3F3A	24
HLA-A	24
HLA-B	24
HLA-H	24
HMGB1	24
HSP90B1	24
IGFBP7	24
ITGB1	24
ITM2B	24
KRT8	24
LGALS3	24
LUM	24
MAL2	24
PIGR	24
PPIA	24
PTGES3	24
REG1A	24
RPL13	24
RPL19	24
RPL21	24
RPL27	24
RPL29	24
RPL30	24
RPL32	24
RPL36	24
RPL41	24
RPL5	24
RPL6	24
RPL7	24
RPS14	24
RPS16	24
RPS18	24
RPS20	24
RPS21	24
RPS23	24
RPS3	24
RPS4X	24
RPS8	24
RPS9	24
RPSA	24
RPSAP58	24
S100A6	24
SAT1	24
SLC12A2	24
SPARC	24
TMED2	24
TMEM123	24
TMSB10	24
ACSL5	23
ACTN4	23
AHCY	23
ANXA2	23
ARF1	23
ARHGDIA	23
BZW1	23
CD151	23
CD44	23
CD74	23
CFL1	23
CKB	23
CLDN3	23
CLDN4	23
CMPK1	23
COL1A1	23
COL1A2	23
COL3A1	23
COL6A2	23
COX4I1	23
CST3	23
CTSB	23
CTSD	23
DEFA5	23
DMBT1	23
DSTN	23
EEF1D	23
EEF1G	23
EIF3CL	23
ENO1	23
ERGIC3	23
FBXW5	23
FCGBP	23
FKBP8	23
FLNA	23
FN1	23
FXYD3	23
GAPDH	23
GNAS	23
GNB2L1	23
GPX2	23
GRN	23
GSTP1	23
HDLBP	23
HLA-DRA	23
HLA-E	23
HSP90AB1	23
HSPA1B	23
HSPB1	23
IFITM1	23
IFITM2	23
IFITM3	23
IGJ	23
KRT18	23
LCN2	23
LGALS4	23
LOC100132247	23
LOC613037	23
LOC647979	23
LOC96610	23
LYZ	23
MALAT1	23
MUC13	23
MUC2	23
MUC5B	23
MYL6	23
NCRNA00188	23
NDUFV1	23
OLFM4	23
P4HB	23
PABPC1	23
PFKL	23
PFN1	23
PGK1	23
PKM2	23
PPA1	23
PPBP	23
PRMT1	23
PSAP	23
PSMA7	23
PYGB	23
RAD21	23
REG3A	23
REG4	23
RHOA	23
RPL10	23
RPL10A	23
RPL11	23
RPL15	23
RPL18	23
RPL18A	23
RPL24	23
RPL27A	23
RPL28	23
RPL3	23
RPL31	23
RPL35	23
RPL35A	23
RPL37	23
RPL37A	23
RPL4	23
RPL7A	23
RPLP0	23
RPLP1	23
RPLP2	23
RPS11	23
RPS12	23
RPS15	23
RPS19	23
RPS2	23
RPS24	23
RPS25	23
RPS5	23
SEPP1	23
SERPINA1	23
SLC25A5	23
SLC25A6	23
SRRM2	23
ST14	23
TFF3	23
TM9SF2	23
TM9SF3	23
TMEM54	23
TPM4	23
TRIM28	23
TSPAN8	23
TUBA1A	23
TUBB2C	23
UBA1	23
UBA52	23
UBB	23
UBC	23
UQCRC1	23
YWHAB	23
