# Supplementary material for: Identifying critical state of complex diseases by single-sample Kullback–Leibler divergence
Source: BMC Genomics. 2020 Jan 28;21:87. doi: 10.1186/s12864-020-6490-7 (PMC6988219; doi:10.1186/s12864-020-6490-7)
Supplement: Supplementary file 3 — Additional file 3. The common signaling genes for acute lung injury. [file 12864_2020_6490_MOESM3_ESM.xlsx]

## Sheet: name
									The common signaling genes for acute lung injury

## Sheet: sKLD-signaling genes
Abcc1
Adm
Afp
Akr1b8
Als2cr13
Ampd3
Angptl4
Antxr1
Anxa3
Anxa7
Areg
Arg2
Arl4a
Asns
Atf3
Bcar3
Bex2
Blvrb
Bmp6
Bnip3
Ccrn4l
Cdc37
Cdkn1a
Cgref1
Cldn4
Ctgf
Ctsh
Cul1
Dedd2
Dnajb1
Eg383901
Eg667723
Eif5
Ereg
Errfi1
Esd
Evl
F3
Fam134b
Fdx1
Fgfbp1
Fkbp5
Fmo2
Gadd45g
Gbe1
Gch1
Gclc
Gclm
Gdf15
Gjb3
Gpx2
Gsr
Gsta1
Gsta2
Hic1
Hmox1
Hsbp1
Hsp90aa1
Hspa1a
Hspa1b
Hspa9
Hspb1
Hspb8
Hsph1
Ifrd1
Il1b
Ints3
Ints6
Itsn1
Kctd9
Klf6
Krt18
Krt8
Loc100047619
Loc100047896
Loc630729
Loc640441
Lox
Lpin2
Lpl
Lrat
Lrrc16a
Maff
Mal
Map2k3
Map3k6
Mboat1
Meis1
Msl3l2
Mt1
Mt2
Myc
Myd116
Ncald
Ncbp2
Nfkbia
Nqo1
Nr1d1
Nupr1
Oaz2
Osgin1
Ottmusg00000014672
Pcbd2
Pde4b
Pdk4
Pex6
Pfn2
Pgd
Pim3
Plaur
Plxna2
Pmaip1
Pnpla2
Ppl
Ppp1r3c
Prickle1
Psmd12
Psmd14
Ptpn14
Ptpn22
Ralgds
Rap2a
S100a8
S100a9
Serpina3n
Sfrs2ip
Sh3bp5
Sh3kbp1
Slc2a1
Slc3a2
Snhg1
Sox4
Sphk1
Spsb1
Sqstm1
Srxn1
Stx6
Sult1a1
Taldo1
Tcf21
Thbs1
Timp3
Tinagl1
Tmem119
Tnfrsf12a
Trp53inp1
Tspan13
Tuba4a
Txn1
Txnl1
Txnrd1
Uchl1
Vapa
Zbtb16
Zwint
Ankrd1
Anxa1
Aqp1
Arhgap1
Atad3a
Atf4
Atp13a2
Atp1a2
Bid
Card10
Cbr3
Cd14
Cd33
Chad
Clca1
Clip1
Ctla2a
Ctps
Cyp2j9
Ddit4
Dnaja1
Dnajb13
Dnajc1
Dpy30
Eif2s2
Epha2
Fabp4
Fosl1
Foxo3
Gadd45a
Gadd45b
Gcs1
Gdap10
Glis2
Gng11
Gnl3
Gpc3
Gtf2i
Hmga1
Hspd1
Inmt
Kcnk2
Klc4
Klf5
Klhl2
Krba1
Lect1
Lmo2
Loc100044204
Loc676654
Loc677317
Mafk
Mbc2
Mpzl2
Nampt
Otub2
Pcyox1
Pdcl3
Perp
Pla2g15
Plekha2
Plk3
Ppap2b
Ppp1r14c
Ppp1r2
Psmc2
Ptgr1
Ptpn2
Ptprd
Rfc2
Sept4
Sirpa
Slc10a6
Slfn4
Snap25
Spns1
Tmem184b
Tmem49
Tnfrsf19
Ttc39c
Ube2f
Ubr3
Usp21
Vegfb
Wdr6
Wfdc2
Xpnpep1

## Sheet: DNB molecules
TUBB2C
RNASEK
CREB1
EREG
HBEGF
PRKCI
FOS
CREG1
ZFAND2A
PTGS1
PTPN14
GTF3C1
ESD
GPX2
HS6ST1
LOC677317
MAFK
CLU
UBXN4
ERRFI1
EIF1A
NMD3
LOC672215
AREG
LOC100047601
TINAGL1
SLC20A1
MRPL28
PPP2R2A
CEBPB
DDX39
NFIC
SCEL
THBS1
VAMP5
SOCS3
TXNRD1
JAM2
S100A8
RNF5
ACOT10
PGD
ATF1
HSP90AB1
ETS1
PMAIP1
ALDOA
TNFRSF12A
PPARG
CHI3L1
ATF4
IFRD1
GCA
NBR1
PDK4
LOC100047868
EG545124
PSMA5
RELA
FOSL1
RARB
AMPD3
MYBL2
GCLC
MYD116
PARD6B
YPEL3
SFPI1
RPL22L1
SLC2A1
CD48
AFP
MAP3K7IP3
TNFSF12
PDE4B
HSP90AA1
ELOVL7
FGFBP1
S100A9
KLF6
SERPINA3N
MMP11
PHLDB1
ALS2CR13
SPNB2
BTG2
SP3
EDN1
HOXB1
TCFAP2A
RTKN2
ZFP281
SERPINE1
BACH1
GTF2F2
PRSS22
UHRF1BP1L
HSPB8
C-MYC
TRIB3
LOX
RELB
EG667723
DHX32
REL
CEBPD
FAM134B
TUFT1
ZFP36
GADD45G
TUBA4A
SULT1A1
CDKN1A
TRP53
MT1
HSPA1B
TBC1D15
ANGPTL4
CSF3R
S100A14
EG383901
DNAJB4
FABP4
ADAMTS4
E2F-1
LOC100047896
LOC640441
LRG1
PDK2
ADM
SLC25A29
COL6A3
EPHA2
GADD45A
INTS6
RHOU
SMAD3
ATF3
TALDO1
DUSP1
ENSMUSG0000004
LOC100046232
OSGIN1
FMNL3
NQO1
NDRG1
HSPA9
IMPACT
GSTA2
TNPO3
HOXC8
SRI
DUSP16
LYVE1
HSPA1A
HSPD1
MT2
PTPN21
TXNL1
JUNB
TIPARP
F3
PODXL
ZFP110
CRYGN
LACE1
PSMD3
IDI1
KLF5
TSPYL4
PPA1
HIGD2A
BCL10
E2F
MYC
JUN
MRPS12
CXCL16
TIMP1
SP2
AR
PRDX1
PLAUR
LRP2
CEBPE
LAMA3
ASNS
PLAA
CYR61
MAFF
COPS3
KCTD9
GLG1
CCRN4L
HSBP1
HIF1A
HSPA8
PSMC1
STAT1
CARKD
TMEM49
GJB3
CH25H
EGR1
IGJ
LITAF
CEBPA
USF1
UBC
KRT7
PPRC1
KLF4
MYB
E2F-2
CXCR7
GNL3
ABCD3
C4B
PPL
GSR
WT1
MPZL2
TGIF1
USF2
MEN1
GP49A
NEDD4L
C1R
HMOX1
OGFRL1
PRR13
CCR2
CLEC16A
TOB2
PPARA
HOXA1
SAMD8
BRCA1
KRT8
ETV4
STAT3
SRXN1
SNHG6
SELM
ARF3
SNHG1
PTGS2
EIF5
EIF2S2
YRDC
NFKB1
ABCC1
CYP51
SP1
IL1B
IL1R2
NOTCH2
DNAJC5
HES6
JUND1
HP

## Sheet: common genes
ABCC1
ADM
AFP
ALS2CR13
AMPD3
ANGPTL4
AREG
ASNS
ATF3
CCRN4L
CDKN1A
EG383901
EG667723
EIF5
EREG
ERRFI1
ESD
F3
FAM134B
FGFBP1
GADD45G
GCLC
GJB3
GPX2
GSR
GSTA2
HMOX1
HSBP1
HSP90AA1
HSPA1A
HSPA1B
HSPA9
HSPB8
IFRD1
IL1B
INTS6
KCTD9
KLF6
KRT8
LOC100047896
LOC640441
LOX
MAFF
MT1
MT2
MYC
MYD116
NQO1
OSGIN1
PDE4B
PDK4
PGD
PLAUR
PMAIP1
PPL
PTPN14
S100A8
S100A9
SERPINA3N
SLC2A1
SNHG1
SRXN1
SULT1A1
TALDO1
THBS1
TINAGL1
TNFRSF12A
TUBA4A
TXNL1
TXNRD1
ATF4
EIF2S2
EPHA2
FABP4
FOSL1
GADD45A
GNL3
HSPD1
KLF5
LOC677317
MAFK
MPZL2
TMEM49
