# Supplementary material for: Identifying critical state of complex diseases by single-sample Kullback–Leibler divergence
Source: BMC Genomics. 2020 Jan 28;21:87. doi: 10.1186/s12864-020-6490-7 (PMC6988219; doi:10.1186/s12864-020-6490-7)
Supplement: Supplementary file 4 — Additional file 4. The common sKLD-signaling genes for LUSC, LUAD and STAD. [file 12864_2020_6490_MOESM4_ESM.xlsx]

## Sheet: name
					The common sKLD-signaling genes for LUSC, LUAD and STAD

## Sheet: LUAD_LUSC
ANLN
ASPM
AURKA
AURKB
BIRC5
BRIP1
BUB1
BUB1B
C21orf45
CBLC
CCNA2
CCNB1
CCNB2
CCNF
CDC20
CDC25C
CDC45
CDC6
CDCA8
CENPA
CENPF
CENPI
DEPDC1B
EFNA3
EME1
ERCC6L
ESPL1
ETV4
EXO1
GINS1
GJB2
HJURP
IQGAP3
ITPKA
KIF11
KIF14
KIF18B
KIF23
KIF2C
KIF4A
MAD2L1
MCM2
MCM4
MCM6
MELK
MKI67
MMP11
MYBL2
NCAPH
NEK2
NFKBIL2
NUF2
ORC6L
PLK1
POLQ
PPAT
PRAME
PRC1
RAD54L
SGOL1
SLC2A1
SPC25
SRD5A1
TIMELESS
TOP2A
TPX2
TROAP
TTK
UBE2C
WDHD1
XRCC2
ZWINT
ABCA12
C15orf42
C16orf75
CENPE
CEP55

## Sheet: LUAD_STAD
ANLN
ATAD2
CCT6A
CENPF
CSE1L
DKC1
DSCC1
ECT2
GMPS
HMGA2
HN1L
HSPD1
IGF2BP3
KIF14
KIF18B
KIF23
MEX3A
MMP11
PPAT
PRC1
RCC2
RECQL4
RFWD3
TOP2A
TPX2
UHRF1
WDHD1
WDR62
XRCC2
C15orf42
CENPO
CST1

## Sheet: LUSC_STAD
PPAT
TOP2A
CTHRC1
KIF14
PAICS
CENPF
COL10A1
XRCC2
STIL
TPX2
MMP11
WDHD1
ANLN
KNTC1
COL11A1
NONO
STRA6
FANCI
KIF26B
C15orf42
KIF18B
KIF23
PRC1

## Sheet: LUSC_LUAD_STAD
PPAT
TOP2A
KIF14
CENPF
XRCC2
TPX2
MMP11
WDHD1
ANLN
C15orf42
KIF18B
KIF23
PRC1
